# Supplementary material for: Echocardiography and lung ultrasonography for the assessment and management of acute heart failure
Source: PubMed Central journal article supplement (PMC5767080; doi:10.1038/nrcardio.2017.56), 2017-04-27
Supplement: NIHMS924963-supplement-Suppl_Fig_1.pdf [file NIHMS924963-supplement-Suppl_Fig_1.pdf]

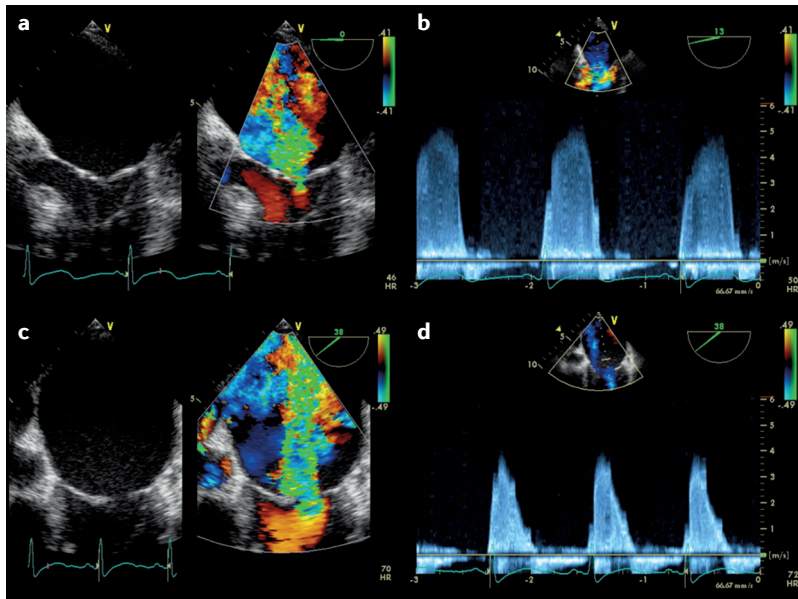

Supplementary figure 1 | **Transoesophageal echocardiography in a patient with dynamic mitral regurgitation.** The patient was hypotensive, with moderate mitral regurgitation shown with **a** | colour Doppler imaging and **b** | continuous-wave Doppler imaging. With volume and pressor loading, the patient developed free mitral regurgitation, with **c** | lack of mitral leaflet coaptation and **d** | a dense, dagger-shaped continuous-wave Doppler signal, with a fall in the pressure difference between the left ventricle and left atrium, confirming the dynamic nature of the regurgitation.
