# Supplementary material for: Echocardiography and lung ultrasonography for the assessment and management of acute heart failure
Source: PubMed Central journal article supplement (PMC5767080; doi:10.1038/nrcardio.2017.56), 2017-04-27
Supplement: NIHMS924963-supplement-Suppl_Fig_2.pdf [file NIHMS924963-supplement-Suppl_Fig_2.pdf]

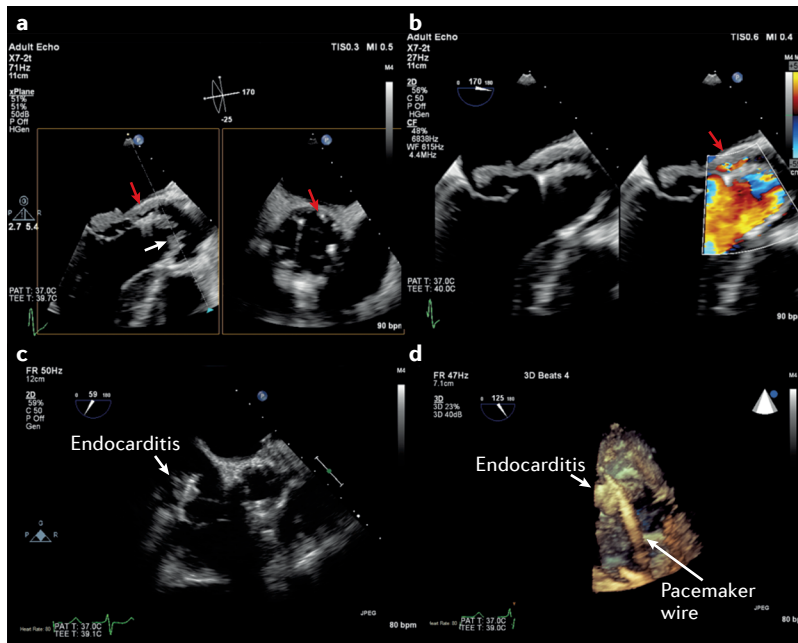

Supplementary figure 2 | **Echocardiographic features of infective endocarditis demonstrated using transoesophageal echocardiography. a,b** | Aortic prosthetic endocarditis showing leaflet thickening (white arrow) and root abscess (red arrows). Lower panels: device-related endocarditis, with vegetations (endocarditis) associated with an atrial pacing wire. Midoesophageal right ventricular inflow–outflow view on **c** | 2D and **d** | 3D imaging.
