# Supplementary material for: Echocardiography and lung ultrasonography for the assessment and management of acute heart failure
Source: PubMed Central journal article supplement (PMC5767080; doi:10.1038/nrcardio.2017.56), 2017-04-27
Supplement: NIHMS924963-supplement-Suppl_Table_1.pdf [file NIHMS924963-supplement-Suppl_Table_1.pdf]

Supplementary table 1 | Common challenges in filling pressure assessment in the acute setting

| Parameter                                     | View and technique                                                                                             | Relevant value(s)                                                                                                                                                                                                                                                                                                                                                                                                                                                                                                | Notes                                                                                                                                                                                                                                                                                              |
|-----------------------------------------------|----------------------------------------------------------------------------------------------------------------|------------------------------------------------------------------------------------------------------------------------------------------------------------------------------------------------------------------------------------------------------------------------------------------------------------------------------------------------------------------------------------------------------------------------------------------------------------------------------------------------------------------|----------------------------------------------------------------------------------------------------------------------------------------------------------------------------------------------------------------------------------------------------------------------------------------------------|
| Isovolumic relaxation time                    | Transmitral filling (PW Doppler)                                                                               | <ul style="list-style-type: none"> <li>• Normal: IVRT 70 + 12 ms</li> <li>• Abnormal diastolic function: IVRT &gt;110 ms</li> <li>• Restrictive physiology: IVRT &lt;60 ms</li> </ul>                                                                                                                                                                                                                                                                                                                            | <ul style="list-style-type: none"> <li>• Independent of inotropic status</li> <li>• Not widely used (requires phonocardiogram for accurate measurement)</li> </ul>                                                                                                                                 |
| E/A ratio                                     | Transmitral filling (PW Doppler)                                                                               | <ul style="list-style-type: none"> <li>• Normal: E/A ratio 0.75–1.40</li> <li>• Abnormal diastolic function: E&lt;A velocity</li> <li>• Restrictive physiology: E&gt;A velocity</li> </ul>                                                                                                                                                                                                                                                                                                                       | <ul style="list-style-type: none"> <li>• Age-dependent and filling-dependent</li> <li>• Not possible to assess in AF or atrial flutter</li> <li>• Might change in presence of ischaemia/incoordination</li> </ul>                                                                                  |
| E deceleration time                           | Transmitral filling (PW Doppler)                                                                               | <ul style="list-style-type: none"> <li>• Normal: E DT 160–240 ms</li> <li>• Abnormal diastolic function: E DT &gt;240 ms</li> <li>• Restrictive physiology: E DT &lt;160 ms</li> </ul>                                                                                                                                                                                                                                                                                                                           | <ul style="list-style-type: none"> <li>• Weak negative correlation with PCWP (<math>r = 0.54</math>)</li> <li>• Sensitivity 86%, specificity 59%</li> </ul>                                                                                                                                        |
| E/E'                                          | Transmitral filling (PW Doppler) plus TDI                                                                      | <ul style="list-style-type: none"> <li>• Normal: &lt;10</li> <li>• Elevated LAP (septal or average): <math>\geq 15</math></li> <li>• Elevated LAP (lateral): <math>\geq 12</math></li> <li>• PPV: &lt;8 (lateral) predicts PCWP &lt;18 mmHg (sensitivity 83%, specificity 88%)</li> </ul>                                                                                                                                                                                                                        | <ul style="list-style-type: none"> <li>• If between 10 and 15, will need additional measures</li> <li>• More accurate in patients with reduced EF</li> <li>• Not validated in: MS, MAC, MVR, MR, AF, pacing</li> <li>• Does not necessarily correlate with presence of pulmonary oedema</li> </ul> |
| Pulmonary vein S/D                            | PW Doppler                                                                                                     | <ul style="list-style-type: none"> <li>• If S/D &gt;0.65 in presence of normal E/A and EF, LAP unlikely to be elevated</li> </ul>                                                                                                                                                                                                                                                                                                                                                                                | <ul style="list-style-type: none"> <li>• Normal values vary with age</li> </ul>                                                                                                                                                                                                                    |
| Pulmonary vein DT                             | PW Doppler                                                                                                     | <ul style="list-style-type: none"> <li>• Calculate LAP</li> <li>• PV-DT &lt;160 ms correlates with PCWP &gt;18 mmHg</li> </ul>                                                                                                                                                                                                                                                                                                                                                                                   | <ul style="list-style-type: none"> <li>• Sensitivity 97%, specificity 96%</li> <li>• Good correlation with PCWP (<math>r = -0.89</math>)</li> <li>• Confounding variables: HR, CO, age, LV compliance, LV afterload, LV relaxation, LAP, PPV</li> </ul>                                            |
| Colour M-mode propagation velocity            | Colour M-mode across MV, measure from MV annulus to 4 cm into left ventricle, slope of first aliasing velocity | <ul style="list-style-type: none"> <li>• &lt;50 cm/s might indicate diastolic disease</li> <li>• PPV: E/Vp &lt;1.7 predicts PCWP &lt;18 mmHg (sensitivity 80%, specificity 100%)</li> </ul>                                                                                                                                                                                                                                                                                                                      | <ul style="list-style-type: none"> <li>• Difficult to obtain high-quality images in TTE</li> <li>• Fairly low sensitivity</li> </ul>                                                                                                                                                               |
| IVC diameter (cm) and collapse with sniff (%) | Subcostal M-mode or 2D echo                                                                                    | <ul style="list-style-type: none"> <li>0–5 mmHg:                             <ul style="list-style-type: none"> <li>• <math>\leq 2.1</math> cm, &gt;50% collapse</li> </ul> </li> <li>5–10 mmHg:                             <ul style="list-style-type: none"> <li>• <math>\leq 2.1</math> cm, &gt;50% collapse</li> <li>• &gt;2.1 cm, &gt;50% collapse</li> </ul> </li> <li>+15 mmHg:                             <ul style="list-style-type: none"> <li>• &gt;2.1 cm, &gt;50% collapse</li> </ul> </li> </ul> | <ul style="list-style-type: none"> <li>• Affected by pressures: intrathoracic, intrapericardial, intra-abdominal</li> <li>• Affected by right heart pathology</li> <li>• Changes in PPV</li> </ul>                                                                                                 |

A, peak late transmitral filling velocity; AF, atrial fibrillation; CO, cardiac output; D, peak pulmonary vein diastolic wave; DT, deceleration time; E, early transmitral filling velocity; E', peak mitral annular velocity; echo, echocardiography; EF, ejection fraction; HR, heart rate; IVC, inferior vena cava; IVRT, isovolumic relaxation time; LAP, left atrial pressure; LV, left ventricular; MAC, mitral annular calcification; MR, mitral regurgitation; MS, mitral stenosis; MV, mitral valve; MVR, mitral valve replacement; PCWP, pulmonary capillary wedge pressure; PPV, positive pressure ventilation; PW, pulsed-wave; S, peak pulmonary vein systolic wave; TDI, tissue Doppler imaging; TTE, transthoracic echocardiography; Vp, peak aortic velocity.
